# Supplementary material for: Endovascular repair of acute vs. subacute uncomplicated type B aortic dissection: a systematic review and meta-analysis
Source: Front Cardiovasc Med. 2023 Jul 12;10:1189750. doi: 10.3389/fcvm.2023.1189750 (PMC10369003; doi:10.3389/fcvm.2023.1189750)
Supplement: Supplementary file 1 [file Table1.xlsx]

## Sheet: Complication rate
study	year	acute-events	acute-total	subacute-events	subacute-total
Dongqiao Xiang	2021	25	142	9	96
Enmin Xie	2021	19	130	15	137
Daniel J	2021	103	446	41	242
Jaideep Das Gupta	2022	255	954	60	316
Adam W. Beck	2022	24	129	14	77
Helen A. Potter	2022	227	841	50	259
total		653	2642	189	1127

## Sheet: 30-day mortality
study	year	acute		subacute
		events	total	events	total
Dongqiao Xiang	2021	2	142	0	96
Enmin Xie	2021	5	130	1	137
Daniel J	2021	26	446	5	242
Jaideep Das Gupta	2022	57	954	8	316
Adam W. Beck	2022	4	129	4	77
Helen A. Potter	2022	55	841	7	259
		149	2642	25	1127

## Sheet: Follow-up mortality(>=1years)
study	year	acute-events	acute-total	subacute-events	subacute-total	time
Dongqiao Xiang(3 years）	2021	10	137	9	73	3
Enmin Xie(5 years)	2021	5	120	11	133	3
Daniel J（1 year）	2021	39	446	14	242	1
Jaideep Das Gupta（1 year）	2022	127	954	24	316	1
Adam W. Beck（1year）	2022	10	129	14	77	1
Helen A. Potter（1year）	2022	94	841	19	259	1
Dongqiao Xiang（1year）	2021	4	137	1	73	1

## Sheet: Detail of complications
	study	year	acute		subacute
			events	total	events	total
Acute renal failure	Dongqiao Xiang	2021	3	142	1	96
	Enmin Xie	2021	/	/	/	/
	Daniel J	2021	9	446	2	242
	Jaideep Das Gupta	2022	/	/	/	/
	Adam W. Beck	2022	2	129	0	77
	Helen A. Potter	2022	/	/	/	/
			14	717	3	415
Type I endoleak	Dongqiao Xiang	2021	14	142	5	96
	Enmin Xie	2021	11	130	10	137
	Daniel J	2021	/	/	/	/
	Jaideep Das Gupta	2022	/	/	/	/
	Adam W. Beck	2022	/	/	/	/
	Helen A. Potter	2022	/	/	/	/
			25	272	15	233
Stroke	Dongqiao Xiang	2021	1	142	0	96
	Enmin Xie	2021	3	130	1	137
	Daniel J	2021	16	446	5	242
	Jaideep Das Gupta	2022	56	954	7	316
	Adam W. Beck	2022	4	129	0	77
	Helen A. Potter	2022	56	841	6	259
			136	2642	19	1127
Rupture	Dongqiao Xiang	2021	2	142	0	96
	Enmin Xie	2021	2	130	0	137
	Daniel J	2021	/	/	/	/
	Jaideep Das Gupta	2022	/	/	/	/
	Adam W. Beck	2022	/	/	/	/
	Helen A. Potter	2022	/	/	/	/
			4	272	0	233
Retrograde type A-AD	Dongqiao Xiang	2021	3	142	0	96
	Enmin Xie	2021	1	130	0	137
	Daniel J	2021	/	/	/	/
	Jaideep Das Gupta	2022	/	/	/	/
	Adam W. Beck	2022	/	/	/	/
	Helen A. Potter	2022	12	841	6	259
			16	1113	6	492
Spinal cord ischaemia	Dongqiao Xiang	2021	/	/	/	/
	Enmin Xie	2021	1	130	3	137
	Daniel J	2021	11	446	10	242
	Jaideep Das Gupta	2022	47	954	14	316
	Adam W. Beck	2022	0	129	2	77
	Helen A. Potter	2022	41	841	12	259
			100	2500	41	1031
Myocardial infarction	Dongqiao Xiang	2021	/	/	/	/
	Enmin Xie	2021	/	/	/	/
	Daniel J	2021	8	446	3	242
	Jaideep Das Gupta	2022	/	/	/	/
	Adam W. Beck	2022	3	129	1	77
	Helen A. Potter	2022	13	841	4	259
			24	1416	8	578

## Sheet: Reintervention
study		year	acute		subacute
			events	total	events	total
Dongqiao Xiang	30-days	2021	/	/	/	/
Enmin Xie		2021	1	130	1	137
Daniel J		2021	28	446	10	242
Jaideep Das Gupta		2022	/	/	/	/
Adam W. Beck		2022	1	129	1	77
Helen A. Potter		2022	43	841	7	259
study		year	acute-events	acute-total	subacute-events	subacute-total
Adam W. Beck	>30-days	2022	7	129	7	77
Daniel J		2021	45	446	19	242
Dongqiao Xiang		2021	15	137	6	73
Enmin Xie		2021	6	120	2	133
Helen A. Potter		2022	73	841	17	259
Jaideep Das Gupta		2022	69	954	12	316

## Sheet:   Patient  characteristics
	Acute (n/n)			Subacute (n/n)
Male gender	Male	Female	total	Male	Female	total
	119	23	142	76	20	96
	107	23	130	115	22	137
	278	168	446	160	82	242
	582	372	954	208	108	316
	84	45	129	54	23	77
	1170	631	1801	613	255	868
Smoking	smoking	no-smoking	total	smoking	no-smoking	total
	67	75	142	41	55	96
	57	73	130	51	86	137
	159	287	446	70	172	242
	339	615	954	83	233	316
	79	50	129	46	31	77
	701	1100	1801	291	577	868
Hypertension	Hypertension	no- Hypertension	total	Hypertension	no- Hypertension	total
	97	45	142	53	43	96
	105	25	130	105	32	137
	397	49	446	232	10	242
	838	116	954	301	15	316
	117	12	129	74	3	77
	1554	247	1801	765	103	868
Coronary artery disease	Coronary artery disease	no- Coronary artery disease	total	Hypertension	no- Hypertension	total
	6	136	142	5	91	96
	22	108	130	25	112	137
	55	391	446	30	212	242
	128	826	954	31	285	316
	18	111	129	10	67	77
	229	1572	1801	101	767	868
Cerebrovascular disease	Coronary artery disease	no- Coronary artery disease	total	Hypertension	no- Hypertension	total
	5	137	142	4	92	96
	5	125	130	9	128	137
	31	415	446	19	223	242
	0	0	0	0	0	0
	6	123	129	2	75	77
	47	800	847	34	518	552
Diabetes mellitus	Coronary artery disease	no- Coronary artery disease	total	Hypertension	no- Hypertension	total
	5	137	142	6	90	96
	7	123	130	10	127	137
	54	392	446	32	210	242
	117	837	954	52	264	316
	14	115	129	12	65	77
	197	1604	1801	112	756	868
COPD	Coronary artery disease	no- Coronary artery disease	total	Hypertension	no- Hypertension	total
	17	125	142	10	86	96
	2	128	130	3	134	137
	76	370	446	36	206	242
	168	786	954	52	264	316
	21	108	129	10	67	77
	284	1517	1801	111	757	868
Renal insufficiency	Coronary artery disease	no- Coronary artery disease	total	Hypertension	no- Hypertension	total
	3	139	142	6	90	96
	18	112	130	11	126	137
	60	386	446	25	217	242
	73	881	954	25	291	316
	10	119	129	4	73	77
	164	1637	1801	71	797	868
